# Supplementary material
Source: HighWire-hosted journal article supplement (https://bmjopenquality.bmj.com/content/12/4/e002349)

# Why is benefit and value realisation important?

Benefits realisation will enable the Partnership to articulate direct and indirect benefits and demonstrate value being achieved. Consistent and aligned articulation of benefits will:

- Provide an **evidence base** for reporting and tracking the success of clinical academic innovations
- Enable **learning and sharing** across the Partnership and beyond
- Support **publications** of the impact of the initiatives
- Support **reporting outputs** across the Partnership (e.g. existing internal governance)
- **Develop a case for future funding** (capital and revenue funding)
- Ensure continued **organisational support**

To achieve this and with support from the Programme team we are asking each clinical academic innovation initiative to create a benefit map in line with their project plans.

# Benefits Mapping Approach

The partnership programme team is working with clinical/operational teams to map benefits in line with the following approach and categories.

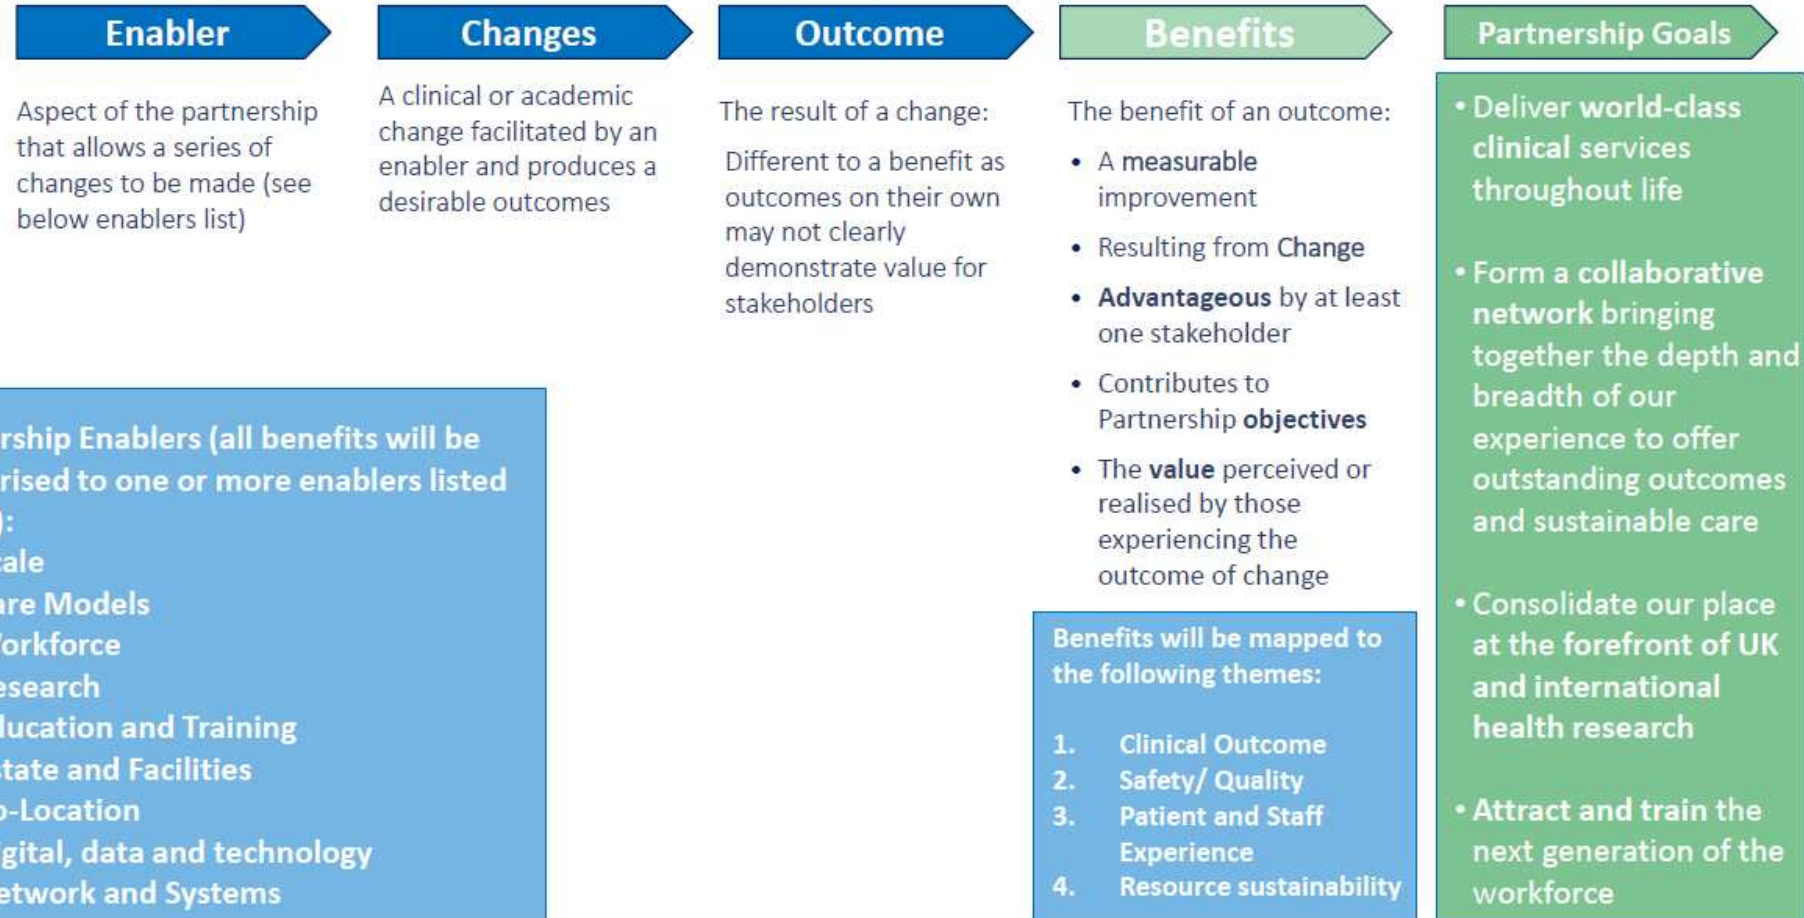

# Benefits mapping template

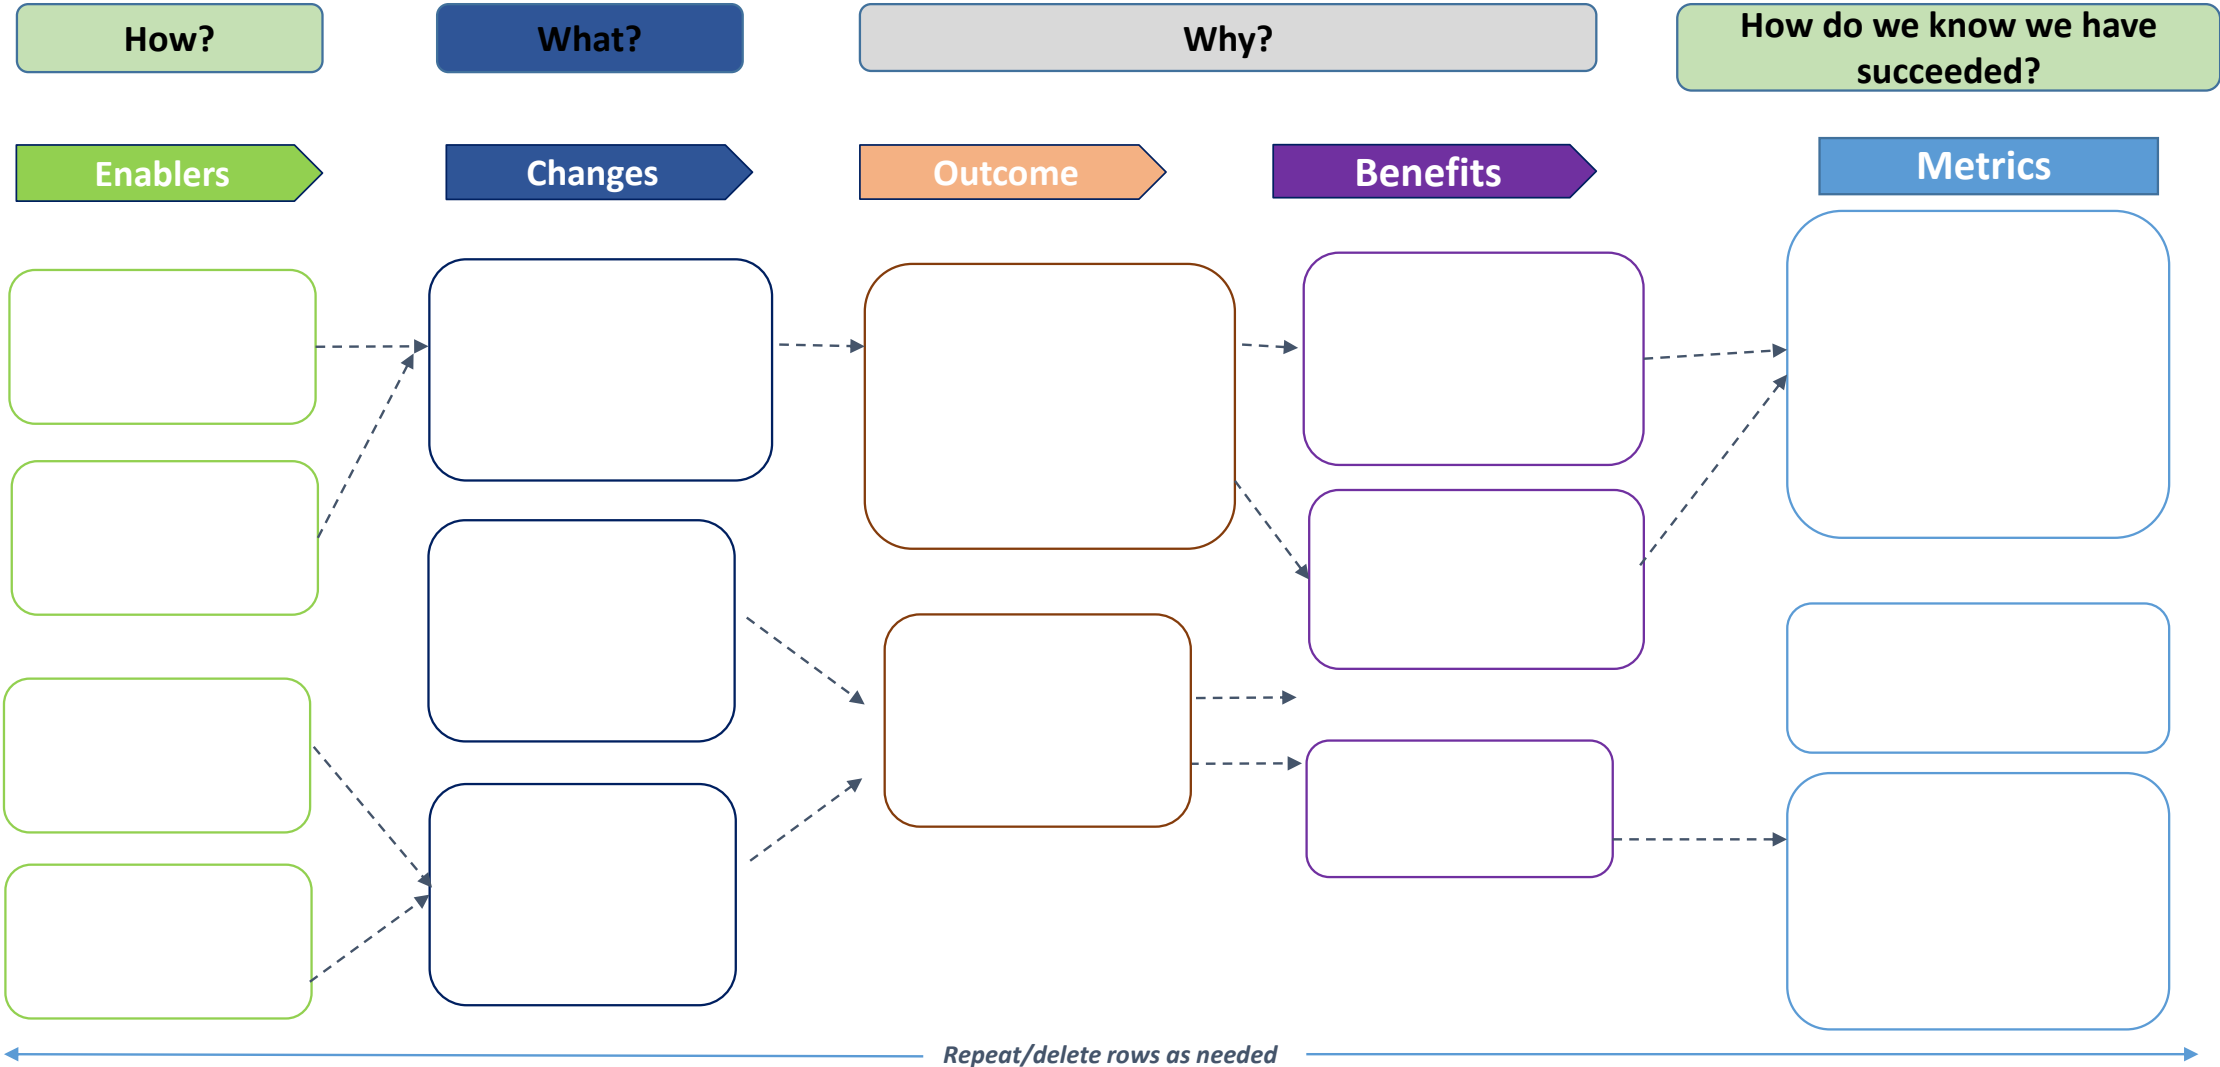

Supplement: inline-supplementary-material-1 [file inline-supplementary-material-1.pdf]
